# Supplementary material for: Active surveillance for adverse events in patients on longer treatment regimens for multidrug-resistant tuberculosis in Viet Nam
Source: PubMed Central journal article supplement (PMC8423256; doi:10.1371/journal.pone.0255357), 2021-09-07
Supplement: pone.0255357.s004.pdf [file pone.0255357.s004.pdf]

Patient's code: **FORM FOR COLLECTION INITIATION INFORMATION OF MDR-TB PATIENT****PATIENT DETAILS**

|                                                                                                                                                                                                                                                                                                                                                       |                                                                                                                                                                                                                                                                                                                       |                                                                                                                                                                                                                                                                                                                                                                                                                                        |                                                                                                                                                                                                                                                                                                                                                                                                |                                                                                                                                                                                                                                                                                                                                                                                                                                                                                                       |                   |
|-------------------------------------------------------------------------------------------------------------------------------------------------------------------------------------------------------------------------------------------------------------------------------------------------------------------------------------------------------|-----------------------------------------------------------------------------------------------------------------------------------------------------------------------------------------------------------------------------------------------------------------------------------------------------------------------|----------------------------------------------------------------------------------------------------------------------------------------------------------------------------------------------------------------------------------------------------------------------------------------------------------------------------------------------------------------------------------------------------------------------------------------|------------------------------------------------------------------------------------------------------------------------------------------------------------------------------------------------------------------------------------------------------------------------------------------------------------------------------------------------------------------------------------------------|-------------------------------------------------------------------------------------------------------------------------------------------------------------------------------------------------------------------------------------------------------------------------------------------------------------------------------------------------------------------------------------------------------------------------------------------------------------------------------------------------------|-------------------|
| <b>Full name:</b>                                                                                                                                                                                                                                                                                                                                     | <b>Sex:</b> <input type="checkbox"/> M <input type="checkbox"/> F                                                                                                                                                                                                                                                     | <b>Date of birth:</b> ___/___/___                                                                                                                                                                                                                                                                                                                                                                                                      | <b>Address:</b>                                                                                                                                                                                                                                                                                                                                                                                | <b>Height:</b> cm                                                                                                                                                                                                                                                                                                                                                                                                                                                                                     | <b>Weight:</b> kg |
| <b>Register N ° MDR-TB:</b>                                                                                                                                                                                                                                                                                                                           | <b>ID No:</b>                                                                                                                                                                                                                                                                                                         | <b>Occupation:</b>                                                                                                                                                                                                                                                                                                                                                                                                                     | <b>Local TB facility:</b>                                                                                                                                                                                                                                                                                                                                                                      |                                                                                                                                                                                                                                                                                                                                                                                                                                                                                                       |                   |
| <b>Patient classification:</b><br><input type="checkbox"/> New<br><input type="checkbox"/> Recurrence<br><input type="checkbox"/> Failure I<br><input type="checkbox"/> Failure II<br><input type="checkbox"/> Treatment after losing to follow-up<br><input type="checkbox"/> Transfer from another facility<br><input type="checkbox"/> Other _____ | <b>Patient situation:</b><br><input type="checkbox"/> Pregnant<br><input type="checkbox"/> Breastfeeding an infant<br><input type="checkbox"/> Alcohol abuse<br><input type="checkbox"/> Drug abuse<br><input type="checkbox"/> Malnutrition<br><input type="checkbox"/> Other _____<br><input type="checkbox"/> None | <b>Other disease:</b><br><input type="checkbox"/> Epilepsy<br><input type="checkbox"/> Psychosis<br><input type="checkbox"/> Anaemia<br><input type="checkbox"/> Diabetes<br><input type="checkbox"/> Renal failure<br><input type="checkbox"/> Liver failure<br><input type="checkbox"/> Digestive disease<br><b>HIV test</b><br><input type="checkbox"/> HIV(+) using ARV drugs<br><input type="checkbox"/> HIV(+) without treatment | <input type="checkbox"/> Eye disease<br><input type="checkbox"/> Auditory disease<br><input type="checkbox"/> Musculoskeletal disease<br><input type="checkbox"/> Thyroid gland disease<br><input type="checkbox"/> Autoimmune Diseases<br><input type="checkbox"/> Other _____<br><input type="checkbox"/> None<br><input type="checkbox"/> HIV(-)<br><input type="checkbox"/> No information | <b>History of drug allergy</b> <input type="checkbox"/> Yes <input type="checkbox"/> No<br>If yes, please specify:<br><br><b>Resistance TB- drugs (excluding isoniazid and rifampicin):</b><br><input type="checkbox"/> Streptomycin <input type="checkbox"/> Capreomycin<br><input type="checkbox"/> Ethambutol <input type="checkbox"/> Ofloxacin<br><input type="checkbox"/> Pyrazinamid <input type="checkbox"/> Other<br><input type="checkbox"/> Amikacin<br><input type="checkbox"/> Kanamycin |                   |

| HISTORY OF DRUG USE (within 30 days before treatment start) |        |           | EVENTS (within 30 days before treatment start) |      |        |                    |      |        |
|-------------------------------------------------------------|--------|-----------|------------------------------------------------|------|--------|--------------------|------|--------|
| Drug                                                        | Dosage | Frequency | Test                                           | Date | Result | Test               | Date | Result |
|                                                             |        |           | RBC(G/l)                                       |      |        | Kali (µmol/l)      |      |        |
|                                                             |        |           | Hb (g/dl)                                      |      |        | Magie (µmol/l)     |      |        |
|                                                             |        |           | WBC (G/l)                                      |      |        | Acid uric (µmol/l) |      |        |
|                                                             |        |           | PLT(G/l)                                       |      |        | Creatinin (µmol/l) |      |        |
|                                                             |        |           | ALT (SGPT) (IU/l)                              |      |        | Ure (mmol/l)       |      |        |
|                                                             |        |           | AST (SGOT) (IU/l)                              |      |        | TSH (µU/l)         |      |        |
|                                                             |        |           | Total bilirubin (µmol/l)                       |      |        | Other              |      |        |
|                                                             |        |           | Unconjugated bilirubin                         |      |        |                    |      |        |

**MDR-TB TREATMENT INFORMATION**

|                        |                                                                                                          |                      |               |                  |
|------------------------|----------------------------------------------------------------------------------------------------------|----------------------|---------------|------------------|
| <b>Starting date:</b>  | <b>Regimen:</b> <input type="checkbox"/> IVA <input type="checkbox"/> IVB <input type="checkbox"/> Other |                      |               |                  |
| <b>Dosage</b>          | <b>Frequency</b>                                                                                         | <b>Other drugs</b>   | <b>Dosage</b> | <b>Frequency</b> |
|                        |                                                                                                          |                      |               |                  |
|                        |                                                                                                          |                      |               |                  |
|                        |                                                                                                          |                      |               |                  |
|                        |                                                                                                          |                      |               |                  |
|                        |                                                                                                          |                      |               |                  |
|                        |                                                                                                          |                      |               |                  |
|                        |                                                                                                          |                      |               |                  |
|                        |                                                                                                          |                      |               |                  |
| <b>Reporting date:</b> | <b>Reporter:</b>                                                                                         | <b>Phone number:</b> |               |                  |

:

**FORM FOR COLLECTION SUSPECTED ADVERSE DRUG REACTION (ADR) INFORMATION**

MDR-TBfacility: \_\_\_\_\_ District : \_\_\_\_\_

|                                                                                                                                                                                                  |                                                                                                                                                                                                             |
|--------------------------------------------------------------------------------------------------------------------------------------------------------------------------------------------------|-------------------------------------------------------------------------------------------------------------------------------------------------------------------------------------------------------------|
| Patient's name: _____<br>Sex: <input type="checkbox"/> Male <input type="checkbox"/> Female      Weight: _____ kg<br>Date of birth: ____/____/____<br>Register number: _____<br>ID number: _____ | Month: _____<br>Date: ____/____/20____<br>Patient situation:<br><input type="checkbox"/> Inpatient<br><input type="checkbox"/> Monthly re-examination<br><input type="checkbox"/> Unsheduled re-examination |
| Monthly re-examination:                                                                                                                                                                          | <input type="checkbox"/> No ADR<br><input type="checkbox"/> ADR happened                                                                                                                                    |

**1. Treatment change**

1.1 Change the regimen:       Yes       No

(If No, go to 1.4)

1.2. If Yes:

| Changed drug | New drugs |
|--------------|-----------|
| 1.           | 1.        |
| 2.           | 2.        |
| 3.           | 3.        |
| 4.           | 4.        |

1.3. Reasons:

- |                                            |                                          |                                           |
|--------------------------------------------|------------------------------------------|-------------------------------------------|
| <input type="checkbox"/> Having ADE        | <input type="checkbox"/> Poor compliance | <input type="checkbox"/> Run out of drug  |
| <input type="checkbox"/> Treatment failure | <input type="checkbox"/> Prenancy        | <input type="checkbox"/> Serious diseases |
|                                            |                                          | <input type="checkbox"/> Other            |

1.4. Using other drugs:       Yes       No

If Yes: \_\_\_\_\_

**2. ADE**

| <i>Conventional codes (Check the codes and fill the blanks)</i>                                                                                                                                                                |                                                                                                                                                                                                                                                                                                                                                                                                    |
|--------------------------------------------------------------------------------------------------------------------------------------------------------------------------------------------------------------------------------|----------------------------------------------------------------------------------------------------------------------------------------------------------------------------------------------------------------------------------------------------------------------------------------------------------------------------------------------------------------------------------------------------|
| <b>Seriousness</b><br><br>0 = Not serious<br>1 = Death<br>2 = Life threatening<br>3 = Requires or prolongs hospitalization<br>4 = Disability or permanent damage<br>5 = Congenital anomaly/ birth defect<br>6 = No information | <b>ADR treatment</b><br><br>0= No treatment<br>1 = Reducing dose<br>2 = Stopping drug<br>3 = Changing regimen<br>4 = Drug to treat ADR (please specify) :<br>41 = Histamin antagonist (please specify)<br>42 = Coticoid (please specify)<br>43 = Adrenalin<br>44 = Other, please specify<br><br>5 Renal dialysis<br>6 Transfer from another facility<br><br>7 No information<br><br>99 Other _____ |

|    | ADE                                                                                                                              | Appearance               | Date | Seriousness | Treatment |
|----|----------------------------------------------------------------------------------------------------------------------------------|--------------------------|------|-------------|-----------|
| 1  | <b>Nausea, vomiting</b>                                                                                                          | <input type="checkbox"/> |      |             |           |
| 2  | <b>Diarrhoea</b>                                                                                                                 | <input type="checkbox"/> |      |             |           |
| 3  | <b>Abdominal pain</b>                                                                                                            | <input type="checkbox"/> |      |             |           |
| 4  | <b>Anorexia</b>                                                                                                                  | <input type="checkbox"/> |      |             |           |
| 5  | <b>Gastritis (Multichoice)</b>                                                                                                   | <input type="checkbox"/> |      |             |           |
|    | 1. Heartburn                                                                                                                     | <input type="checkbox"/> |      |             |           |
|    | 2. Epigastric pain                                                                                                               | <input type="checkbox"/> |      |             |           |
|    | 3. Results gastroscopy (specify results)                                                                                         | <input type="checkbox"/> |      |             |           |
| 6  | <b>Hepatotoxicity (Multichoice)</b>                                                                                              | <input type="checkbox"/> |      |             |           |
|    | 1. Jaundice, yellow eyes                                                                                                         | <input type="checkbox"/> |      |             |           |
|    | 2. Dark urine                                                                                                                    | <input type="checkbox"/> |      |             |           |
|    | 3. Pale stools                                                                                                                   | <input type="checkbox"/> |      |             |           |
|    | 4. The right upper quadrant abdominal pain                                                                                       | <input type="checkbox"/> |      |             |           |
|    | 5. Itchy                                                                                                                         | <input type="checkbox"/> |      |             |           |
|    | 6. ASAT, ALAT increasing<br>ASAT = _____ (U/l)<br>ALAT = _____                                                                   | <input type="checkbox"/> |      |             |           |
|    | 7. Bilirubin increasing<br>Total Bilirubin = _____ ( $\mu\text{mol/l}$ )<br>Unconjugated Bilirubin = _____ ( $\mu\text{mol/l}$ ) | <input type="checkbox"/> |      |             |           |
| 7  | <b>Headache</b>                                                                                                                  | <input type="checkbox"/> |      |             |           |
| 8  | <b>Dizziness, vertigo</b>                                                                                                        | <input type="checkbox"/> |      |             |           |
| 9  | <b>Seizures, epilepsy</b>                                                                                                        | <input type="checkbox"/> |      |             |           |
| 10 | <b>Psychosis (Multichoice)</b>                                                                                                   | <input type="checkbox"/> |      |             |           |
|    | 1. Hallucinations, auditory hallucinations                                                                                       | <input type="checkbox"/> |      |             |           |
|    | 2. Confusing thoughts                                                                                                            | <input type="checkbox"/> |      |             |           |
|    | 3. Odd behavior                                                                                                                  | <input type="checkbox"/> |      |             |           |
|    | 4. Depression                                                                                                                    | <input type="checkbox"/> |      |             |           |
|    | 5. Insomnia                                                                                                                      | <input type="checkbox"/> |      |             |           |
|    | 6. Losing focus                                                                                                                  | <input type="checkbox"/> |      |             |           |
|    | 7. Having suicidal                                                                                                               | <input type="checkbox"/> |      |             |           |
| 11 | <b>Peripheral neuropathy</b>                                                                                                     | <input type="checkbox"/> |      |             |           |
|    | Finger and toe numbness                                                                                                          | <input type="checkbox"/> |      |             |           |
| 12 | <b>Arthralgia</b>                                                                                                                | <input type="checkbox"/> |      |             |           |
| 13 | <b>Allergic reaction (Multichoice)</b>                                                                                           | <input type="checkbox"/> |      |             |           |
|    | 1. Rash                                                                                                                          | <input type="checkbox"/> |      |             |           |
|    | 2. Itchy                                                                                                                         | <input type="checkbox"/> |      |             |           |
|    | 3. Hypersensitive skin with light                                                                                                | <input type="checkbox"/> |      |             |           |

|           | <b>Biến cố bất lợi</b>                                                                         | <b>Appearance</b>        | <b>Date</b> | <b>Serious</b> | <b>Treatment</b> |
|-----------|------------------------------------------------------------------------------------------------|--------------------------|-------------|----------------|------------------|
| <b>14</b> | <b><i>Nephrotoxic (Multichoice)</i></b>                                                        | <input type="checkbox"/> |             |                |                  |
|           | 1. Retention of urine                                                                          | <input type="checkbox"/> |             |                |                  |
|           | 2. Oedema                                                                                      | <input type="checkbox"/> |             |                |                  |
|           | 3. Creatinine increasing ( <i>specific result</i> )<br>Creatinine = _____ (μmol/l)             | <input type="checkbox"/> |             |                |                  |
|           | 4. Urea increasing<br>Urea = _____ (mmol/l)                                                    | <input type="checkbox"/> |             |                |                  |
| <b>15</b> | <b><i>Vestibular - auditory disorders (Multichoice)</i></b>                                    | <input type="checkbox"/> |             |                |                  |
|           | 1. Blurred hearing/ deaf                                                                       | <input type="checkbox"/> |             |                |                  |
|           | 2. Vestibular Disorders                                                                        | <input type="checkbox"/> |             |                |                  |
| <b>16</b> | <b><i>Visual disturbances (Multichoice)</i></b>                                                | <input type="checkbox"/> |             |                |                  |
|           | 3. Blurred vision                                                                              | <input type="checkbox"/> |             |                |                  |
|           | 4. Difficulty in distinguishing colors                                                         | <input type="checkbox"/> |             |                |                  |
| <b>17</b> | <b><i>Hypothyroidism (Multichoice)</i></b>                                                     | <input type="checkbox"/> |             |                |                  |
|           | 1. Thyroid hypertrophy                                                                         | <input type="checkbox"/> |             |                |                  |
|           | 2. Constipation                                                                                | <input type="checkbox"/> |             |                |                  |
|           | 3. Weight gain                                                                                 | <input type="checkbox"/> |             |                |                  |
|           | 4. Dry skin, dry hair                                                                          | <input type="checkbox"/> |             |                |                  |
|           | 5. Intolerant of cold                                                                          | <input type="checkbox"/> |             |                |                  |
|           | 6. Husky speaking                                                                              | <input type="checkbox"/> |             |                |                  |
|           | 7. Slow pulse                                                                                  | <input type="checkbox"/> |             |                |                  |
|           | 8. Menstrual Disorders (in women), sexual disorders (in men)                                   | <input type="checkbox"/> |             |                |                  |
|           | 9. TSH increasing ( <i>specific result</i> )<br>TSH = _____ (μU/l)                             | <input type="checkbox"/> |             |                |                  |
|           | 10. T3, T4 decreasing ( <i>specific result</i> )<br>T3 = _____ (nmol/l)<br>T4 = _____ (nmol/l) | <input type="checkbox"/> |             |                |                  |
| <b>18</b> | <b><i>Potassium decreasing (specific result)</i></b><br>K+ = _____ (mmol/l)                    | <input type="checkbox"/> |             |                |                  |
| <b>19</b> | <b><i>Uric acid increasing (specific result)</i></b><br>Uric Acid = _____ (μmol/l)             | <input type="checkbox"/> |             |                |                  |
| <b>20</b> | <b><i>Rối loạn huyết học (Multichoice)</i></b>                                                 | <input type="checkbox"/> |             |                |                  |
|           | 1. Anemia ( <i>specific result</i> )<br>Hb = _____ (g/dl)                                      | <input type="checkbox"/> |             |                |                  |
|           | 2. Neutropenia ( <i>specific result</i> )<br>WBC = _____ ( x 10 <sup>9</sup> /l)               | <input type="checkbox"/> |             |                |                  |
|           | 3. Thrombocytopenia ( <i>specific result</i> )<br>PLT = _____ ( x 10 <sup>9</sup> /l)          | <input type="checkbox"/> |             |                |                  |
| <b>21</b> | <b><i>Endocrine disorders (Multichoice)</i></b>                                                | <input type="checkbox"/> |             |                |                  |

|           | <b>Biến cố<br/>bất lợi</b>                                     | <b>Appearance</b>        | <b>Date</b> | <b>Serious</b> | <b>Treatment</b> |
|-----------|----------------------------------------------------------------|--------------------------|-------------|----------------|------------------|
|           | 1. Breast enlargement (in males)                               | <input type="checkbox"/> |             |                |                  |
|           | 2. Physiological dysfunction (in men)                          | <input type="checkbox"/> |             |                |                  |
|           | 3. Menstrual Disorders (in women)                              | <input type="checkbox"/> |             |                |                  |
| <b>22</b> | <b>Reactions at the injection site (Multichoice)</b>           | <input type="checkbox"/> |             |                |                  |
|           | 1. Pain                                                        | <input type="checkbox"/> |             |                |                  |
|           | 2. Swollen                                                     | <input type="checkbox"/> |             |                |                  |
|           | 3. Callosity                                                   | <input type="checkbox"/> |             |                |                  |
|           | 4. Itchy                                                       | <input type="checkbox"/> |             |                |                  |
| <b>23</b> | <b>Anaphylaxis (Multichoice)</b>                               | <input type="checkbox"/> |             |                |                  |
|           | 1. On skin ( <i>rash, itchy and vasodilation...</i> )          | <input type="checkbox"/> |             |                |                  |
|           | 2. On respiratory ( <i>Dyspnea, tracheal constriction...</i> ) | <input type="checkbox"/> |             |                |                  |
|           | 3. Hypotension                                                 | <input type="checkbox"/> |             |                |                  |
|           | 4. On gastrointestinal (stomach cramps, diarrhea)              | <input type="checkbox"/> |             |                |                  |
| <b>99</b> | <b>Other</b>                                                   | <input type="checkbox"/> |             |                |                  |

|                                      |                           |                              |
|--------------------------------------|---------------------------|------------------------------|
| <b>Date:</b><br><br>____/____/20____ | <b>Signature:</b><br><br> | <b>Phone number:</b><br><br> |
|--------------------------------------|---------------------------|------------------------------|
